# Supplementary material for: Implementation of real-time source apportionment approaches using the ACSM–Xact–Aethalometer (AXA) setup with SoFi RT: the Athens case study
Source: Copernicus journal article supplement (doi:10.5194/amt-18-3983-2025), 2025-08-26
Supplement: Supplementary file 1 [file amt-18-3983-2025-supplement.pdf]

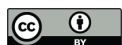

*Supplement of*

**Implementation of real-time source apportionment approaches using the ACSM–Xact–Aethalometer (AXA) setup with SoFi RT: the Athens case study**

**Manousos I. Manousakas et al.**

*Correspondence to:* André S. H. Prevot ([andre.prevot@psi.ch](mailto:andre.prevot@psi.ch)) and Konstantinos Eleftheriadis ([elefther@ipta.demokritos.gr](mailto:elefther@ipta.demokritos.gr))

The copyright of individual parts of the supplement might differ from the article licence.

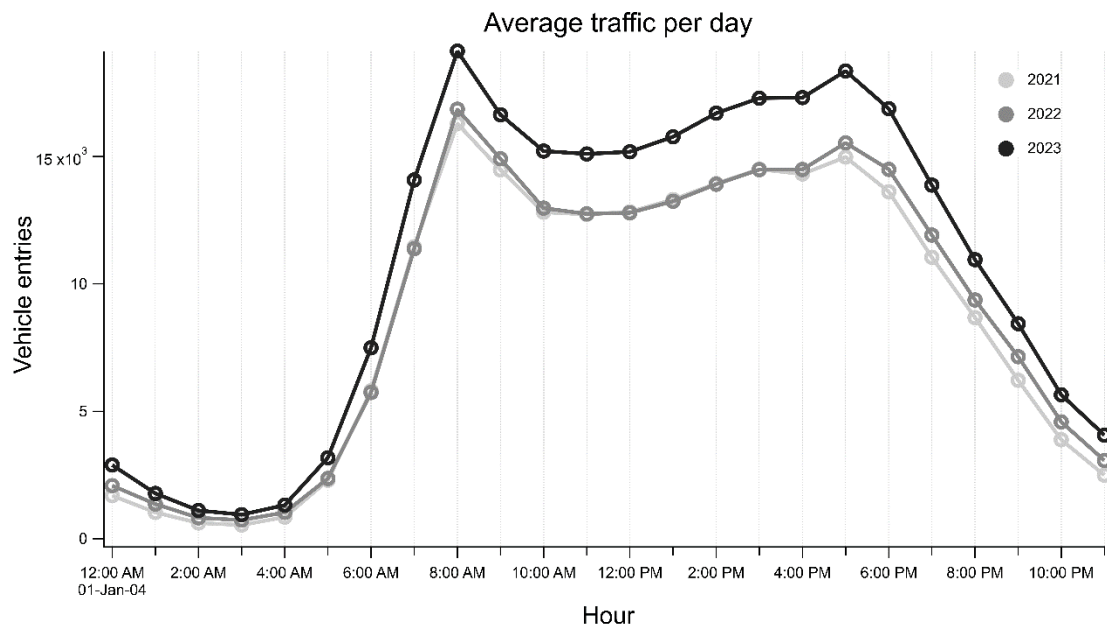

**Figure S1.** Traffic density per hour on the highway road near the Demokritos campus

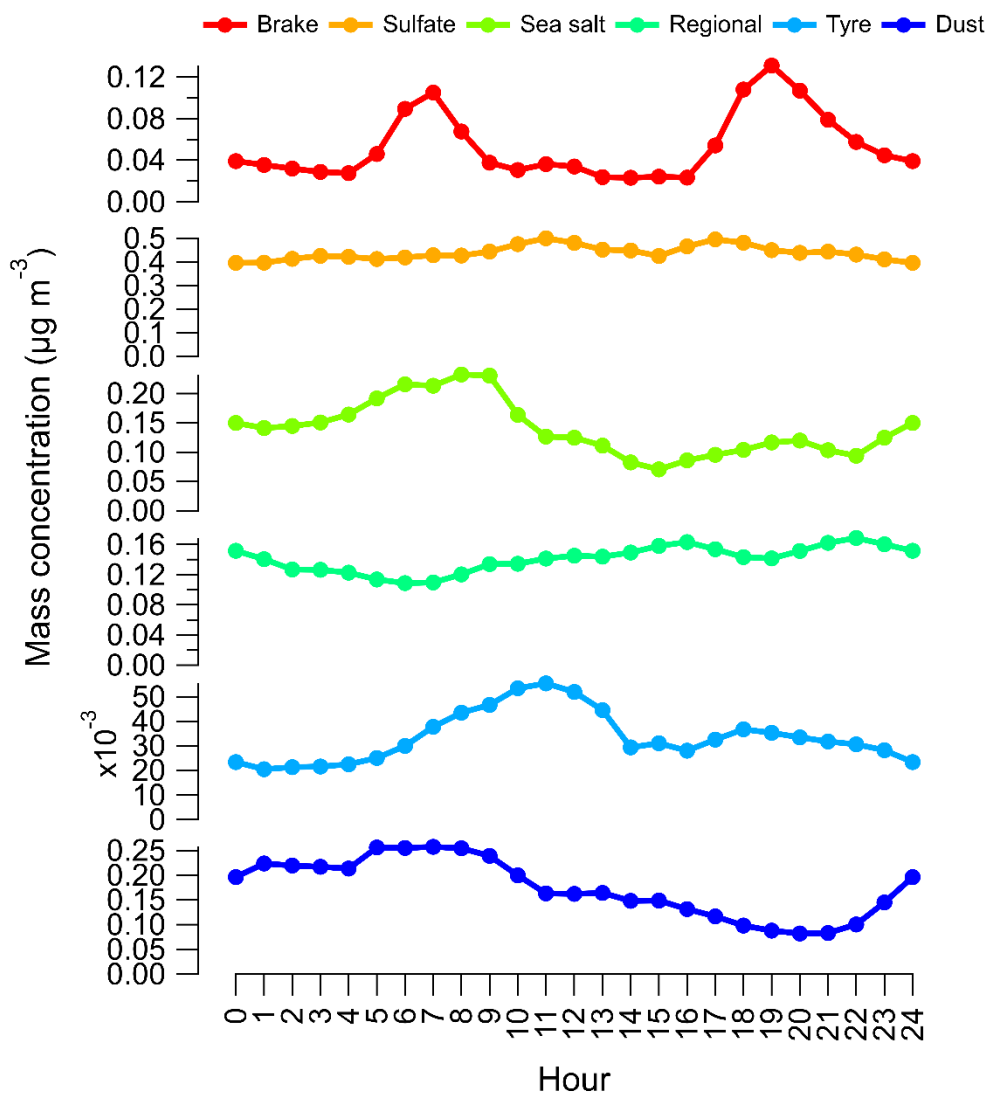

**Figure S2.** Diurnal variability of Near Real time obtained factors from RT PMF on Xact data

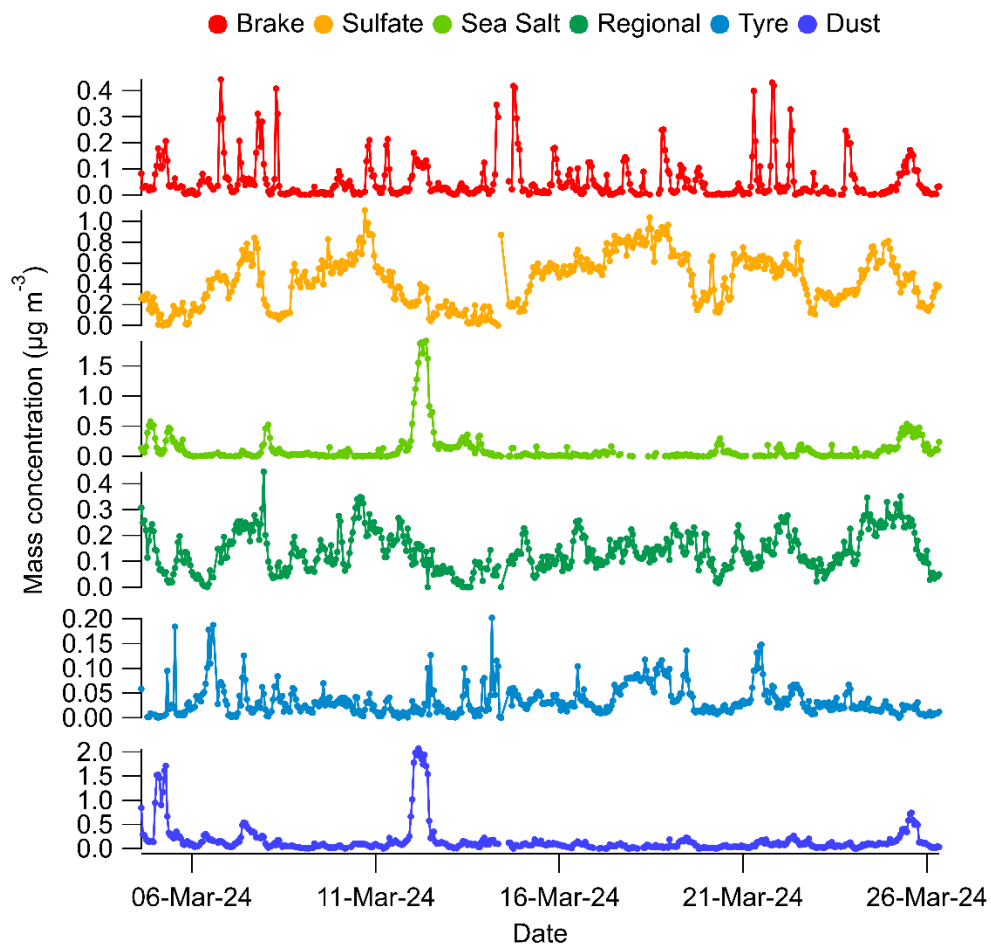

**Figure S3.** Temporal variability of Near Real time obtained factors from RT PMF on Xact data

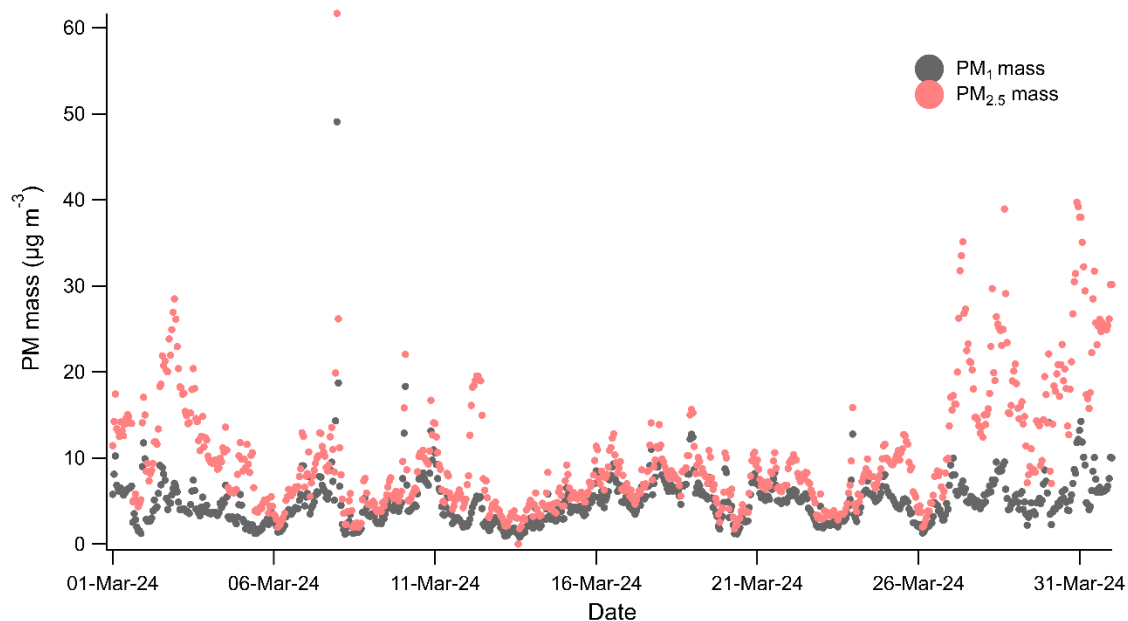

**Figure S4.** PM1 and PM2.5 concentrations measured by OPC

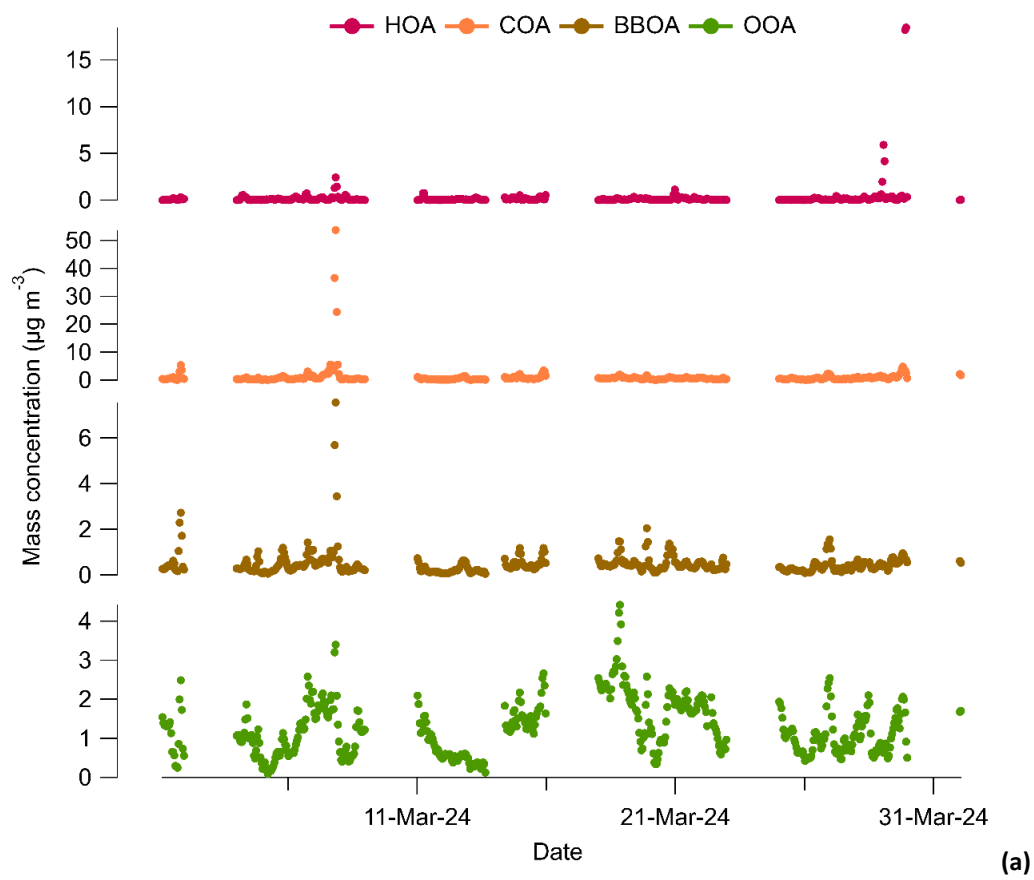

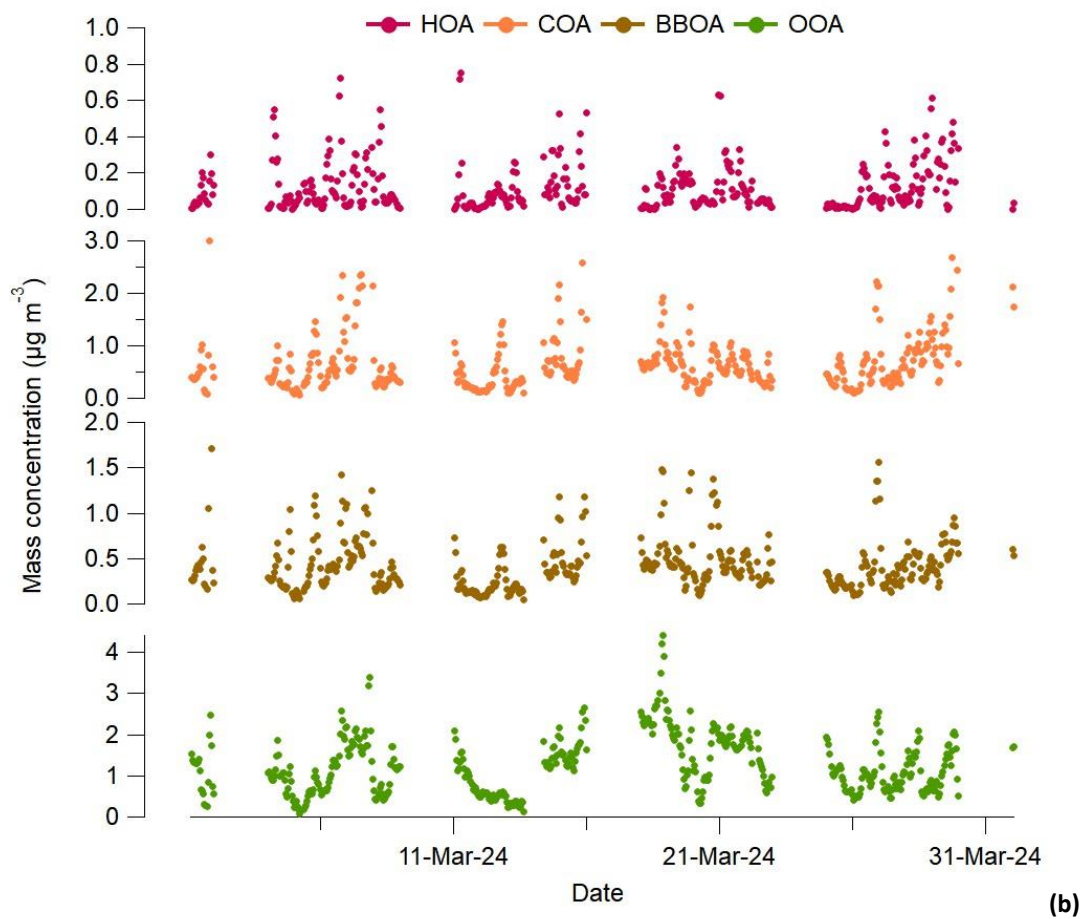

**Figure S5.** Temporal variability of Near Real time obtained organic factors from RT PMF on ACSM data in original scale (a), and zoomed in (b)

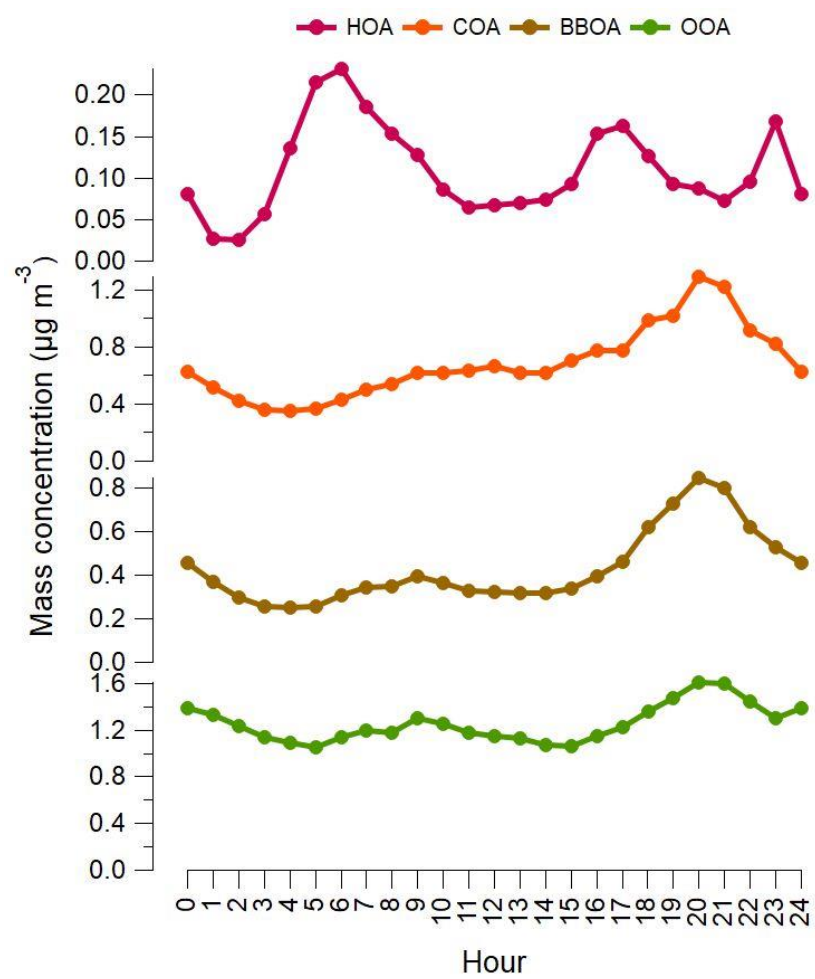

**Figure S6.** Diurnal variability of Near Real time obtained organic factors from RT PMF on ACSM data

**Table S1. Xact profiles of Base case and RT with zero/non-zero**

|      | Base case  |         |          |          |           |       |
|------|------------|---------|----------|----------|-----------|-------|
|      | Brake wear | Sulfate | Sea salt | Regional | Tyre wear | Dust  |
| Si   | 0          | 0       | 0        | 0        | 0         | 0.490 |
| X_S  | 0.050      | 0.980   | 0.080    | 0.570    | 0.290     | 0.020 |
| Cl   | 0          | 0       | 0.840    | 0.010    | 0         | 0     |
| K    | 0          | 0.020   | 0        | 0.310    | 0.210     | 0.060 |
| Ca   | 0.060      | 0       | 0.070    | 0        | 0.170     | 0.340 |
| Ti   | 0          | 0       | 0        | 0        | 0         | 0.010 |
| V    | 0          | 0       | 0        | 0        | 0         | 0     |
| Cr   | 0          | 0       | 0        | 0        | 0         | 0     |
| Mn   | 0          | 0       | 0        | 0        | 0.010     | 0     |
| Fe   | 0.860      | 0       | 0.010    | 0.080    | 0.180     | 0.070 |
| Ni   | 0          | 0       | 0        | 0        | 0         | 0     |
| Cu   | 0.020      | 0       | 0        | 0        | 0         | 0     |
| Zn   | 0          | 0       | 0        | 0.010    | 0.120     | 0     |
| X_As | 0          | 0       | 0        | 0        | 0.010     | 0     |
| Br   | 0          | 0       | 0        | 0.010    | 0         | 0     |
| Sr   | 0          | 0       | 0        | 0        | 0         | 0     |
| Pb   | 0          | 0       | 0        | 0        | 0.010     | 0     |

|      | RT with Zero/non Zero |         |          |          |           |       |
|------|-----------------------|---------|----------|----------|-----------|-------|
|      | Brake wear            | Sulfate | Sea salt | Regional | Tyre wear | Dust  |
| Si   | 0                     | 0       | 0        | 0        | 0         | 0.315 |
| X_S  | 0                     | 1.000   | 0.2600   | 0.598    | 0.254     | 0     |
| Cl   | 0                     | 0       | 0.608    | 0        | 0         | 0     |
| K    | 0                     | 0       | 0        | 0.353    | 0.142     | 0.073 |
| Ca   | 0                     | 0       | 0.131    | 0        | 0         | 0.389 |
| Ti   | 0                     | 0       | 0        | 0        | 0         | 0.025 |
| V    | 0                     | 0       | 0        | 0.004    | 0         | 0     |
| Cr   | 0.052                 | 0       | 0        | 0        | 0         | 0     |
| Mn   | 0.094                 | 0       | 0        | 0        | 0.007     | 0     |
| Fe   | 0.335                 | 0       | 0        | 0.023    | 0.406     | 0.195 |
| Ni   | 0                     | 0       | 0        | 0.003    | 0         | 0     |
| Cu   | 0.254                 | 0       | 0        | 0        | 0.014     | 0     |
| Zn   | 0.265                 | 0       | 0        | 0        | 0.152     | 0     |
| X_As | 0                     | 0       | 0        | 0        | 0.015     | 0     |
| Br   | 0                     | 0       | 0        | 0.017    | 0         | 0     |
| Sr   | 0                     | 0       | 0        | 0        | 0         | 0.004 |
| Pb   | 0.001                 | 0.000   | 0.001    | 0.002    | 0.010     | 0.000 |



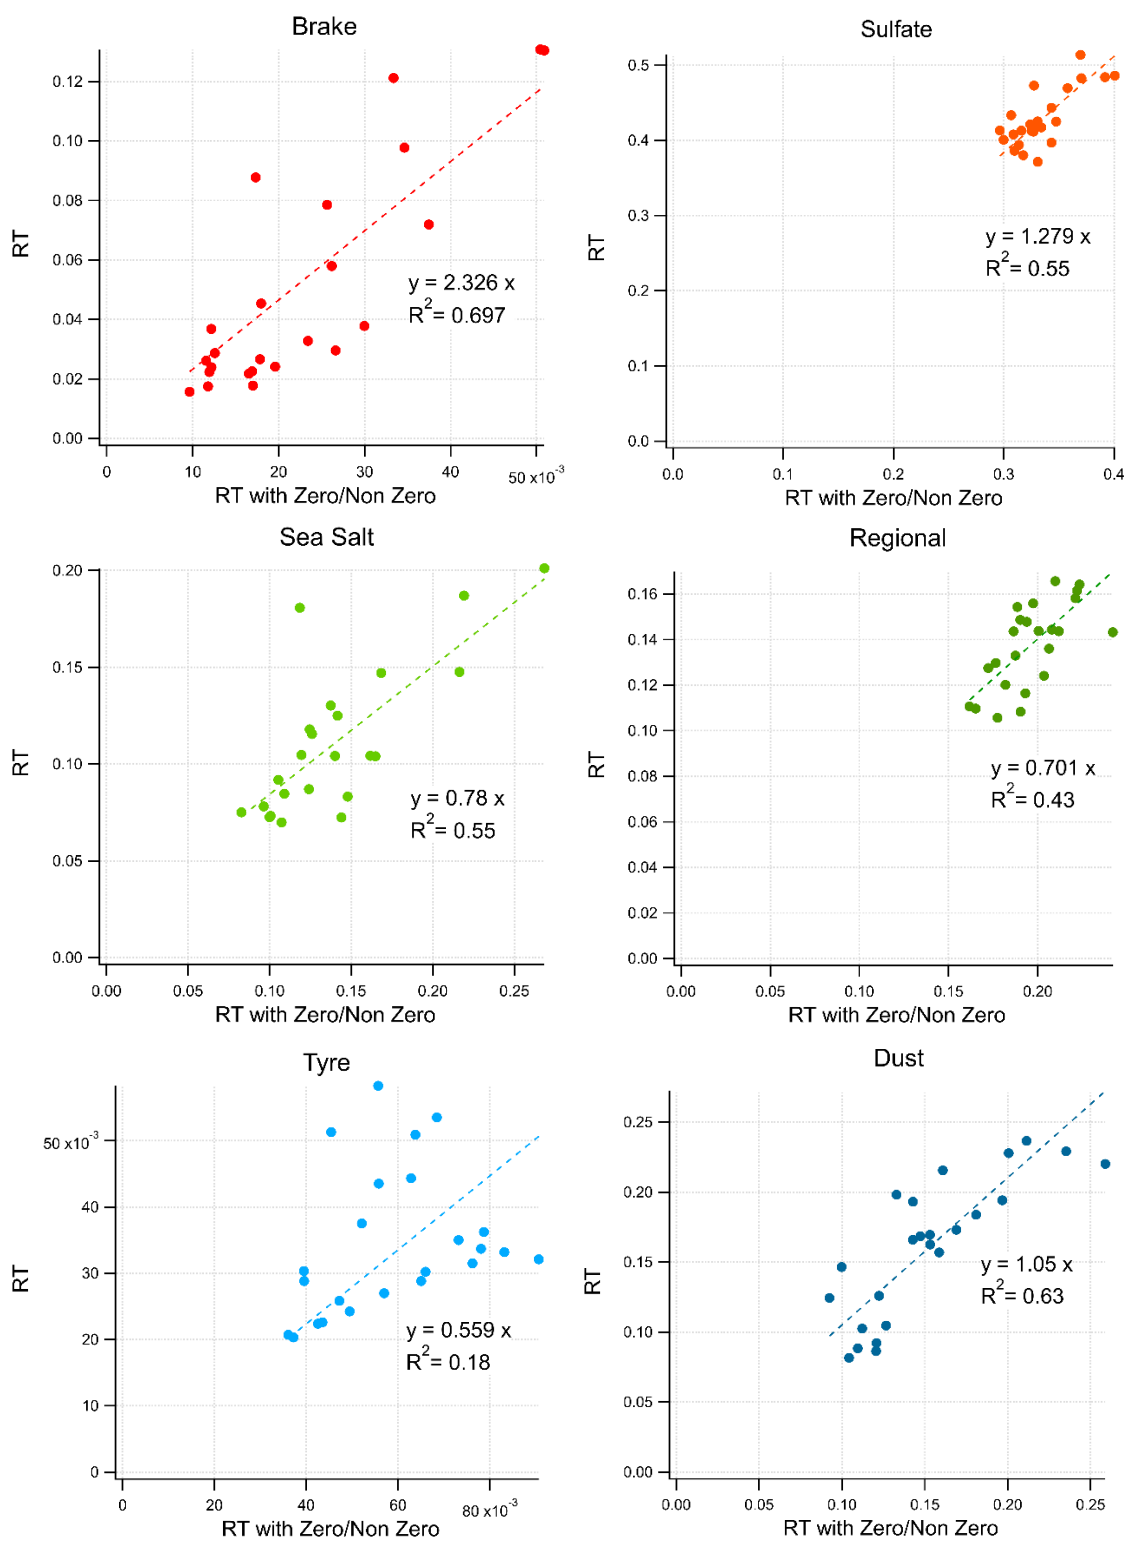

**Figure S7.** Xact scatter plots of Xact RT and RT zero/non-zero diurnal trends

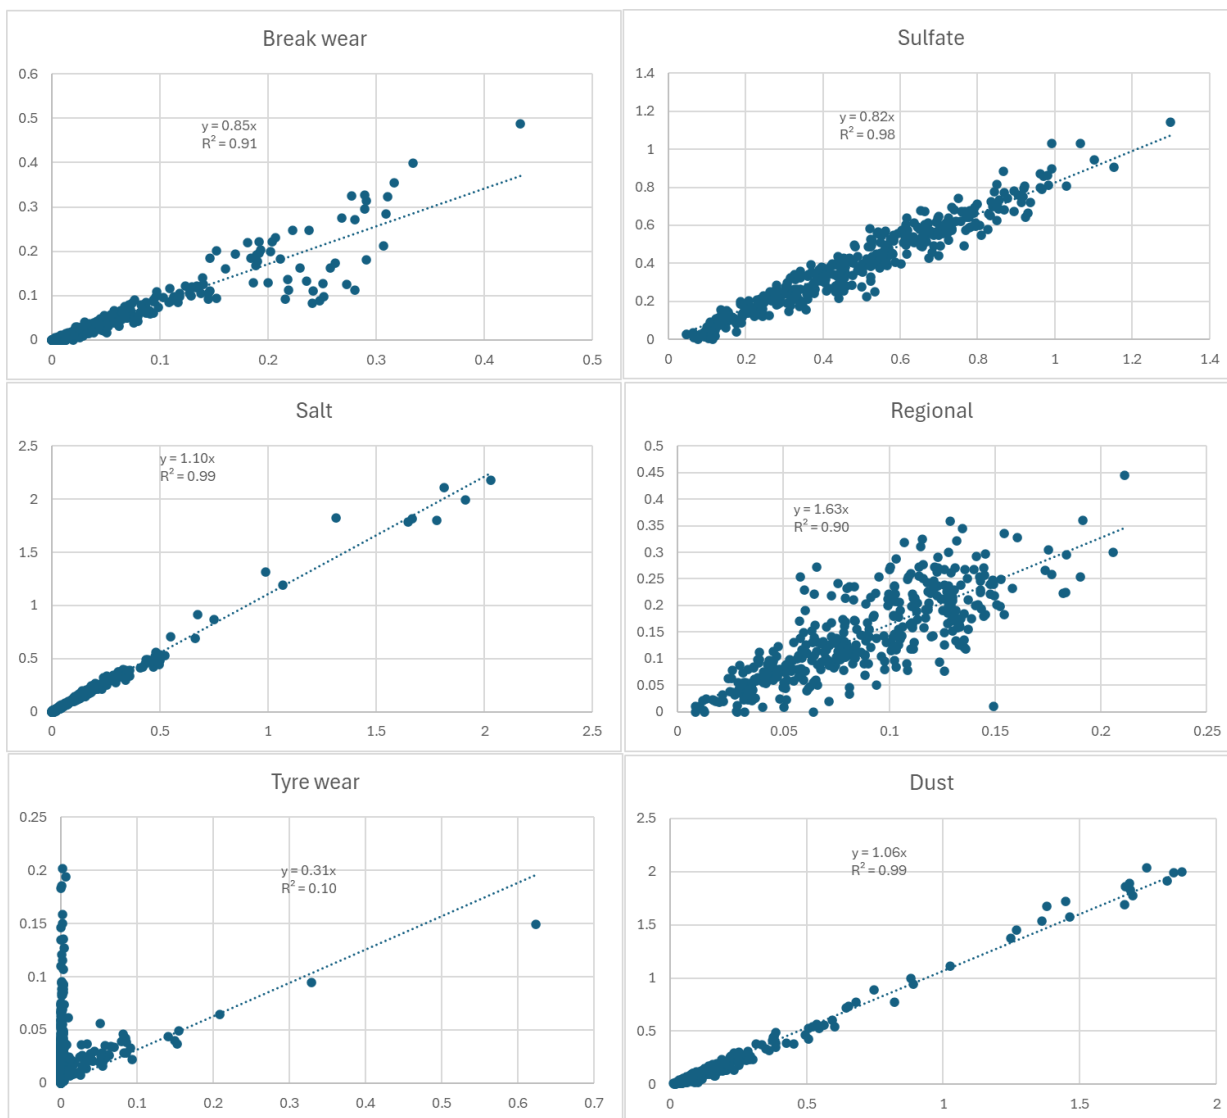

**Figure S8.** Scatter plots of elemental OP SA and RT SA source contributions using the zero/non-zero approach. x-axis represents the zero/non-zero approach run in  $\mu\text{g}/\text{m}^3$ , while the y-axis the OP-SA run in  $\mu\text{g}/\text{m}^3$

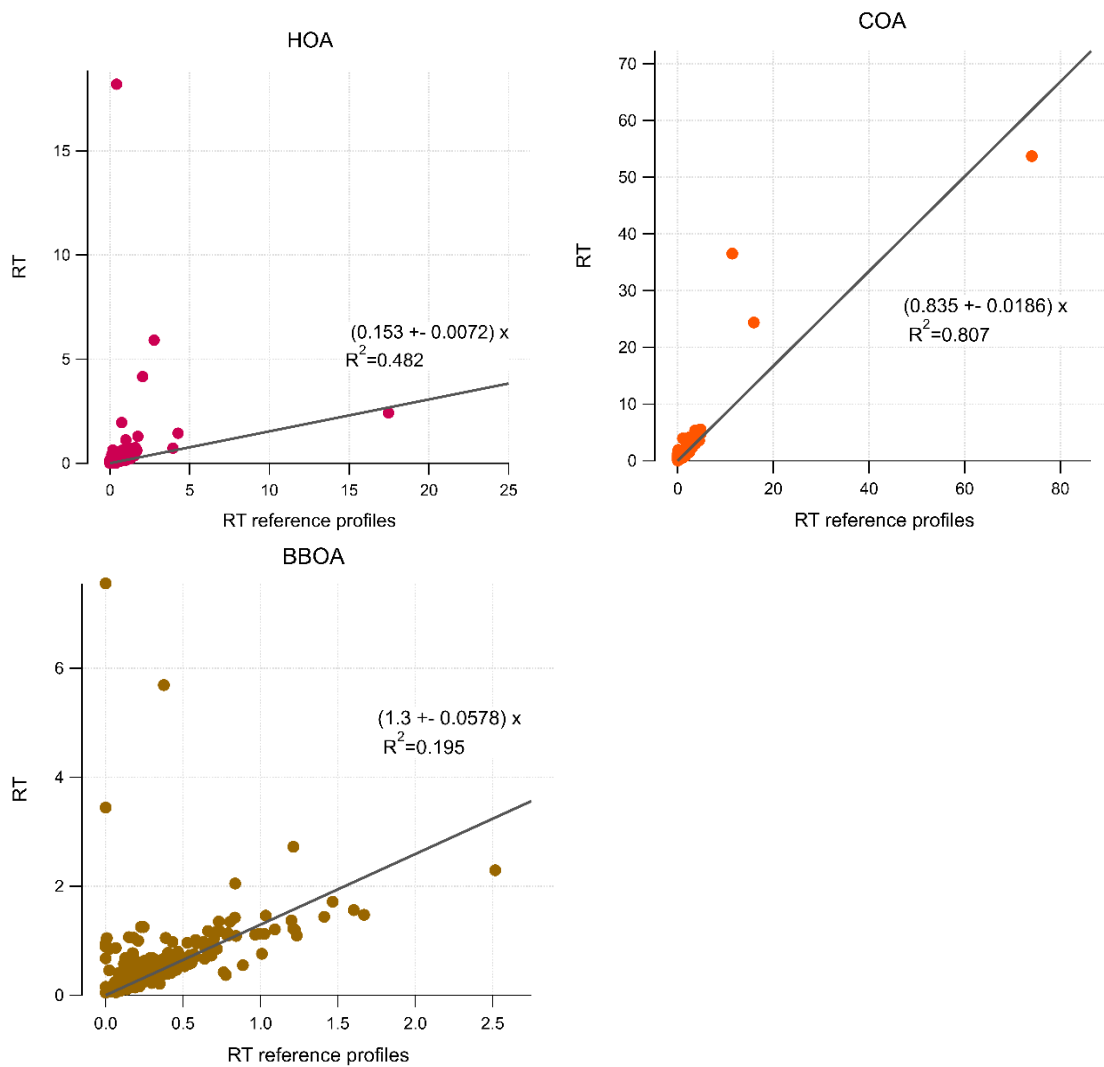

**Figure S9.** Scatter plots of organic OP SA and RT SA source contributions using the reference profiles
